# Supplementary material
Source: PubMed Central journal article supplement (PMC8776587)
Supplement: NIHMS1740861-supplement-1.pdf [file NIHMS1740861-supplement-1.pdf]

**Supplemental Material for:**

**Title:** Identifying periods of heightened susceptibility to lead exposure in relation to behavioral problems

**Authors:** Clara G. Sears <sup>1,2</sup>, Bruce P. Lanphear <sup>3</sup>, Yingying Xu <sup>4</sup>, Aimin Chen <sup>5</sup>, Kimberly Yolton <sup>6</sup>, Joseph M. Braun<sup>1</sup>

<sup>1</sup> Department of Epidemiology, Brown University, Providence, RI, USA

<sup>2</sup> Division of Environmental Medicine, Department of Medicine, University of Louisville, Louisville, KY, USA

<sup>3</sup> Faculty of Health Sciences, Simon Fraser University, Burnaby, BC, Canada

<sup>4</sup> Division of General and Community Pediatrics, Cincinnati Children's Hospital, Cincinnati, OH, USA

<sup>5</sup> Department of Biostatistics, Epidemiology and Informatics, University of Pennsylvania Perelman School of Medicine, Philadelphia, PA, USA

<sup>6</sup> Department of Pediatrics, Cincinnati Children's Hospital, University of Cincinnati College of Medicine, Cincinnati, OH, USA

## Table of Contents

**Table S1.** BASC-2 scores among HOME Study children (n=244; 918 repeats)

**Table S2.** Participant characteristics at baseline (first observation) and eight-year visit.

**Table S3.** Adjusted difference in BASC-2 Composite Scales at ages 2, 3, 4, 5, and 8 years per unit increase in ln-transformed blood lead concentration.

**Table S4.** Adjusted difference in Externalizing Problems subscales at ages 2, 3, 4, 5, and 8 years per unit increase in ln-transformed blood lead concentration.

**Table S5.** Analyses of the sex-differences in periods of susceptibility to lead and the relations of blood lead concentrations with BASC-2 scores.

**Table S6.** Adjusted difference in BASC-2 Composite Scales at ages 2, 3, 4, 5, and 8 years per unit increase in ln-transformed blood lead concentration from sensitivity analyses adjusting for cotinine measures.

**Table S7.** Adjusted relative risk of BASC-2 scores classified as at-risk or clinically significant at ages 2, 3, 4, 5, and 8 years per unit increase in ln-transformed blood lead concentrations from sensitivity analyses adjusting for cotinine measures.

**Table S8.** Adjusted difference in BASC-2 Composite Scales at ages 2, 3, 4, 5, and 8 years per unit increase in ln-transformed blood lead concentration from sensitivity analyses adjusting for other covariates.

**Table S9.** Adjusted relative risk of BASC-2 scores classified as at-risk or clinically significant at ages 2, 3, 4, 5, and 8 years per unit increase in ln-transformed blood lead concentrations from sensitivity analyses adjusting for other covariates.

**Table S10.** Adjusted difference in BASC-2 Composite Scales per unit increase in ln-transformed blood lead concentration from sensitivity analyses.

**Figure S1.** Adjusted difference in repeated BASC-2 composite scores at ages 2-8 years per unit increase in ln-transformed blood lead concentration at ages 1, 2, 3, 4, 5, and 8 years by sex.

**Figure S2.** Adjusted difference in repeated BASC-2 composite scores at ages 2, 3, 4, 5, and 8 years per unit increase in ln-transformed blood lead concentration at ages 1, 2, 3, 4, 5, and 8 years in the injury prevention (n=125) and lead hazard (n=119) intervention groups.

**Table S1.** BASC-2 scores among HOME Study children (n=244; 918 repeats)

| BASC-2 Scale             | Mean (SD) of BASC-2 Scores at Ages |               |               |               |              |              | ICC <sup>a</sup> |
|--------------------------|------------------------------------|---------------|---------------|---------------|--------------|--------------|------------------|
|                          | Total<br>n=244                     | 2 Y<br>n= 222 | 3 Y<br>n= 210 | 4 Y<br>n= 151 | 5Y<br>n= 164 | 8Y<br>n= 171 |                  |
| Adaptive Skills          | 49.0 (9.2)                         | 42.0 (6.6)    | 51.0 (7.4)    | 50.3 (8.7)    | 53.1 (9.1)   | 50.5 (9.7)   | 0.48             |
| Behavioral Symptom Index | 49.4 (8.5)                         | 50.4 (6.5)    | 50.4 (9.1)    | 48.5 (8.0)    | 47.2 (9.5)   | 49.6 (9.2)   | 0.59             |
| Internalizing Problems   | 47.3 (9.0)                         | 45.1 (6.9)    | 50.3 (10.2)   | 47.0 (8.3)    | 45.8 (9.7)   | 48.3 (8.8)   | 0.54             |
| Externalizing Problems   | 48.6 (8.9)                         | 47.6 (7.1)    | 49.7 (9.6)    | 48.9 (8.3)    | 47.1 (9.4)   | 49.8 (9.7)   | 0.57             |
| Hyperactivity            | 49.7 (9.2)                         | 49.7 (8.3)    | 50.9 (9.3)    | 49.5 (8.3)    | 47.6 (9.7)   | 50.5 (10.0)  | 0.53             |
| Aggression               | 47.8 (9.0)                         | 46.0 (7.0)    | 48.5 (10.3)   | 48.5 (8.9)    | 47.1 (9.2)   | 49.3 (9.2)   | 0.52             |
| Conduct                  | 49.9 (10.5)                        | -             | -             | -             | -            | 49.9 (10.5)  | -                |
| <b>Females</b>           | n=132                              | n= 119        | n= 113        | n= 84         | n= 89        | n= 94        |                  |
| Adaptive Skills          | 50.8 (8.9)                         | 43.1 (6.5)    | 53.1 (7.1)    | 52.0 (7.6)    | 54.7 (8.5)   | 53.0 (9.4)   | 0.41             |
| Behavioral Symptom Index | 48.5 (8.6)                         | 49.5 (6.4)    | 49.8 (9.3)    | 47.4 (7.6)    | 46.8 (10.1)  | 48.2 (9.1)   | 0.64             |
| Internalizing Problems   | 48.0 (9.5)                         | 45.3 (7.1)    | 51.3 (11.3)   | 47.7 (7.8)    | 47.0 (10.8)  | 48.8 (8.9)   | 0.54             |
| Externalizing Problems   | 47.5 (8.9)                         | 46.6 (7.3)    | 49.1 (9.9)    | 47.3 (7.6)    | 46.4 (10.3)  | 47.9 (9.2)   | 0.63             |
| Hyperactivity            | 48.4 (9.0)                         | 48.2 (8.2)    | 49.9 (9.2)    | 47.9 (7.6)    | 46.8 (10.1)  | 48.8 (9.7)   | 0.53             |
| Aggression               | 47.1 (9.3)                         | 45.6 (7.5)    | 48.5 (10.7)   | 47.3 (8.2)    | 46.7 (10.4)  | 47.8 (9.0)   | 0.60             |
| Conduct                  | 48.0 (9.8)                         | -             | -             | -             | -            | 48.0 (9.8)   | -                |
| <b>Males</b>             | n= 112                             | n= 103        | n= 97         | n= 67         | n= 75        | n= 77        |                  |
| Adaptive Skills          | 46.9 (9.0)                         | 40.8 (6.4)    | 48.7 (7.2)    | 48.3 (9.4)    | 51.3 (9.4)   | 47.5 (9.3)   | 0.50             |
| Behavioral Symptom Index | 50.5 (8.3)                         | 51.5 (6.4)    | 51.1 (8.8)    | 49.9 (8.3)    | 47.8 (8.7)   | 51.4 (9.1)   | 0.52             |
| Internalizing Problems   | 46.5 (8.3)                         | 45.0 (6.6)    | 49.2 (8.7)    | 46.2 (8.9)    | 44.4 (8.2)   | 47.6 (8.6)   | 0.54             |
| Externalizing Problems   | 49.9 (8.6)                         | 48.8 (6.7)    | 50.3 (9.3)    | 50.9 (8.8)    | 47.9 (8.2)   | 52.1 (9.8)   | 0.48             |
| Hyperactivity            | 51.3 (9.1)                         | 51.5 (8.1)    | 52.0 (9.3)    | 51.6 (8.8)    | 48.7 (9.1)   | 52.7 (10.0)  | 0.51             |
| Aggression               | 48.6 (8.6)                         | 46.4 (6.3)    | 48.6 (10.0)   | 50.1 (9.4)    | 47.6 (7.5)   | 51.1 (9.2)   | 0.40             |
| Conduct                  | 52.1 (10.9)                        | -             | -             | -             | -            | 52.0 (10.9)  |                  |

<sup>a</sup> Between-child and within-child variance was calculated using linear mixed models with an unstructured correlation matrix and a fixed linear effect for child age. ICC= Intraclass correlation coefficient is the ratio of the between-person variation to the sum of the between- and within-person variation.

**Table S2.** Participant characteristics at baseline (first observation) and eight-year visit.

| <b>Characteristic</b>                  | <b>Baseline<br/>(%)</b> | <b>Eight Year Visit<br/>(%)</b> |
|----------------------------------------|-------------------------|---------------------------------|
| Total                                  | 244                     | 147                             |
| Child Sex                              |                         |                                 |
| Male                                   | 112 (46)                | 69 (47)                         |
| Female                                 | 132 (54)                | 78 (53)                         |
| Maternal Race/Ethnicity                |                         |                                 |
| non-Hispanic White                     | 189 (77)                | 106 (72)                        |
| non-Hispanic Black                     | 55 (23)                 | 41 (28)                         |
| Intervention                           |                         |                                 |
| Injury Prevention                      | 125 (51)                | 75 (51)                         |
| Lead Hazard                            | 119 (49)                | 72 (49)                         |
| Maternal Education                     |                         |                                 |
| High School or Less                    | 37 (15)                 | 24 (16)                         |
| Some College                           | 59 (24)                 | 45 (31)                         |
| College Graduate                       | 148 (61)                | 78 (53)                         |
| Household Income                       |                         |                                 |
| < \$45,000                             | 70 (29)                 | 49 (33)                         |
| \$45,000- 75,000                       | 92 (38)                 | 53 (36)                         |
| >\$75,000                              | 82 (33)                 | 45 (31)                         |
| Child's Average Serum Cotinine (ng/mL) |                         |                                 |
| <0.02                                  | 61 (25)                 | 31 (21)                         |
| 0.02 to 0.22                           | 123 (50)                | 74 (50)                         |
| >0.22                                  | 60 (25)                 | 42 (29)                         |
| Year Housing Unit Built                |                         |                                 |
| =<1924                                 | 76 (31)                 | 49 (34)                         |
| >1924 to 1955                          | 97 (40)                 | 57 (39)                         |
| >1955 - 1978                           | 70 (29)                 | 40 (27)                         |
| Residential Ownership                  |                         |                                 |
| No                                     | 61 (25)                 | 43 (29)                         |
| Yes                                    | 182 (75)                | 103 (71)                        |
| Move between ages 1, 2, 3 years        |                         |                                 |
| No                                     | 167 (69)                | 91 (62)                         |
| Yes                                    | 75 (31)                 | 55 (38)                         |

**Table S3.** Adjusted difference in BASC-2 Composite Scales at ages 2, 3, 4, 5, and 8 years per unit increase in ln-transformed blood lead concentration.

| BASC-2 Composite Scale         | Exposure Period (years) | Age-adjusted      |                 | Fully-adjusted   |                 |
|--------------------------------|-------------------------|-------------------|-----------------|------------------|-----------------|
|                                |                         | $\beta$ (95% CI)  | Heterogeneity p | $\beta$ (95% CI) | Heterogeneity p |
| Adaptive Skills                |                         |                   | 0.48            |                  | 0.22            |
|                                | 1                       | -1.0 (-2.7, 0.6)  |                 | -0.3 (-1.8, 1.3) |                 |
|                                | 2                       | -0.3 (-2.1, 1.5)  |                 | 0.8 (-0.8, 2.5)  |                 |
|                                | 3                       | -1.4 (-3.5, 0.6)  |                 | -0.2 (-2.0, 1.5) |                 |
|                                | 4                       | -1.2 (-3.8, 1.3)  |                 | 0.1 (-2.3, 2.5)  |                 |
|                                | 5                       | -1.8 (-4.7, 1.1)  |                 | -0.5 (-3.3, 2.3) |                 |
| Behavioral Symptom Index (BSI) | 8                       | -3.1 (-6.0, -0.2) |                 | -2.2 (-4.9, 0.5) |                 |
|                                |                         |                   | 0.44            |                  | 0.45            |
|                                | 1                       | 1.0 (-0.4, 2.5)   |                 | 0.3 (-1.3, 1.9)  |                 |
|                                | 2                       | 1.3 (-0.5, 3.0)   |                 | 0.3 (-1.3, 2.0)  |                 |
|                                | 3                       | 2.2 (0.5, 3.8)    |                 | 1.1 (-0.6, 2.8)  |                 |
|                                | 4                       | 2.0 (0.0, 4.1)    |                 | 1.0 (-1.1, 3.1)  |                 |
| Externalizing Problems         | 5                       | 2.3 (-0.3, 4.9)   |                 | 1.4 (-1.3, 4.1)  |                 |
|                                | 8                       | 3.3 (0.9, 5.6)    |                 | 2.5 (0.1, 4.9)   |                 |
|                                |                         |                   | 0.24            |                  | 0.20            |
|                                | 1                       | 1.1 (-0.5, 2.6)   |                 | 0.6 (-1.0, 2.1)  |                 |
|                                | 2                       | 1.6 (-0.1, 3.3)   |                 | 0.9 (-0.6, 2.5)  |                 |
|                                | 3                       | 2.5 (0.8, 4.3)    |                 | 1.8 (0.1, 3.4)   |                 |
| Internalizing Problems         | 4                       | 1.6 (-0.4, 3.6)   |                 | 0.9 (-1.1, 2.9)  |                 |
|                                | 5                       | 2.2 (-0.2, 4.5)   |                 | 1.6 (-0.8, 4.1)  |                 |
|                                | 8                       | 3.6 (1.2, 6.0)    |                 | 3.1 (0.7, 5.4)   |                 |
|                                |                         |                   | 0.91            |                  | 0.89            |
|                                | 1                       | 0.7 (-0.8, 2.2)   |                 | 0.5 (-1.1, 2.1)  |                 |
|                                | 2                       | 0.6 (-1.2, 2.4)   |                 | 0.5 (-1.1, 2.2)  |                 |
|                                | 3                       | 0.4 (-1.5, 2.2)   |                 | 0.1 (-1.7, 1.9)  |                 |
|                                | 4                       | 0.4 (-1.7, 2.6)   |                 | 0.5 (-1.6, 2.5)  |                 |
|                                | 5                       | 0.4 (-2.0, 2.8)   |                 | 0.6 (-1.8, 2.9)  |                 |
|                                | 8                       | 1.6 (-0.4, 3.5)   |                 | 1.3 (-0.6, 3.3)  |                 |

Age-adjusted model includes child's age (continuous) as covariate. Fully-adjusted includes child's age, sex, intervention group, household income, maternal race, maternal depressive symptoms, child's serum cotinine.

Total participants = 244 (BASC observations: 2Y = 222; 3Y = 210; 4Y = 151; 5Y = 164; 8Y = 171).

Heterogeneity p-values included to indicate difference in associations by exposure timing.

**Table S4.** Adjusted difference in Externalizing Problems subscales at ages 2, 3, 4, 5, and 8 years per unit increase in ln-transformed blood lead concentration.

| Externalizing Problems Subscale | Exposure Period (years) | Age-adjusted     |                 | Fully-adjusted   |                 |
|---------------------------------|-------------------------|------------------|-----------------|------------------|-----------------|
|                                 |                         | $\beta$ (95% CI) | Heterogeneity p | $\beta$ (95% CI) | Heterogeneity p |
| Hyperactivity                   |                         |                  | 0.25            |                  | 0.25            |
|                                 | 1                       | 0.8 (-0.8, 2.4)  |                 | 0.3 (-1.3, 2.0)  |                 |
|                                 | 2                       | 1.6 (-0.1, 3.3)  |                 | 0.9 (-0.7, 2.6)  |                 |
|                                 | 3                       | 2.4 (0.8, 4.0)   |                 | 1.7 (0.1, 3.3)   |                 |
|                                 | 4                       | 1.9 (-0.2, 3.9)  |                 | 1.2 (-0.8, 3.3)  |                 |
|                                 | 5                       | 2.4 (0.0, 4.8)   |                 | 2.0 (-0.6, 4.5)  |                 |
| Aggression                      | 8                       | 3.7 (1.1, 6.4)   |                 | 3.2 (0.6, 5.8)   |                 |
|                                 |                         |                  | 0.63            |                  | 0.68            |
|                                 | 1                       | 1.1 (-0.4, 2.7)  |                 | 0.9 (-0.6, 2.5)  |                 |
|                                 | 2                       | 1.2 (-0.4, 2.8)  |                 | 0.9 (-0.7, 2.4)  |                 |
|                                 | 3                       | 2.1 (0.3, 3.9)   |                 | 1.7 (-0.1, 3.4)  |                 |
|                                 | 4                       | 0.9 (-1.1, 2.8)  |                 | 0.6 (-1.4, 2.5)  |                 |
| Conduct <sup>a</sup>            | 5                       | 1.4 (-0.9, 3.8)  |                 | 1.2 (-1.2, 3.7)  |                 |
|                                 | 8                       | 2.1 (-0.1, 4.3)  |                 | 1.9 (-0.3, 4.1)  |                 |
|                                 |                         |                  | 0.97            |                  | 0.63            |
|                                 | 1                       | 3.2 (0.2, 6.1)   |                 | 1.7 (-1.0, 4.5)  |                 |
|                                 | 2                       | 3.1 (0.5, 5.6)   |                 | 1.4 (-0.9, 3.7)  |                 |
|                                 | 3                       | 3.6 (1.0, 6.3)   |                 | 1.7 (-0.7, 4.0)  |                 |
|                                 | 4                       | 3.1 (-0.1, 6.3)  |                 | 1.0 (-2.1, 4.0)  |                 |
|                                 | 5                       | 3.3 (0.2, 6.4)   |                 | 1.6 (-1.6, 4.8)  |                 |
|                                 | 8                       | 4.0 (1.4, 6.6)   |                 | 2.8 (0.6, 5.1)   |                 |

Age-adjusted model includes child's age (continuous) as covariate. Fully-adjusted includes child's age, sex, intervention group, household income, maternal race, maternal depressive symptoms, child's serum cotinine.

Total participants for Hyperactivity and Aggression subscales = 244 (BASC observations: 2Y = 222; 3Y = 210; 4Y = 151; 5Y = 164; 8Y = 171).

<sup>a</sup> Conduct subscale assessed only at age 8 years: Total participants = 147.

Heterogeneity p-values included to indicate difference in associations by exposure timing.

**Table S5.** Analyses of the sex-differences in periods of susceptibility to lead and the relations of blood lead concentrations with BASC-2 scores.

| BASC- 2 Composite Scale<br>or Subscale | <b>Multiple Informant with GEE</b>           | <b>Modified Poisson</b>         |
|----------------------------------------|----------------------------------------------|---------------------------------|
|                                        | <b>Models</b>                                | <b>Regression Models</b>        |
|                                        | Sex*lead*exposure age interaction<br>p-value | Sex*lead<br>Interaction p-value |
| Adaptive Skills                        | 0.02                                         | 0.50                            |
| Behavioral Symptom Index (BSI)         | 0.29                                         | 0.59                            |
| Internalizing                          | 0.94                                         | 0.86                            |
| Externalizing                          | 0.66                                         | 0.66                            |
| <i>Hyperactivity</i>                   | 0.40                                         | 0.94                            |
| <i>Aggression</i>                      | 0.58                                         | 0.19                            |
| <i>Conduct</i>                         | 0.98                                         | 0.76                            |

Models adjusted for child's age, sex, intervention group, household income, maternal race, maternal depressive symptoms, child's serum cotinine.  
Multiple Informant with GEE models also includes lead by exposure period, sex by exposure period, and lead by sex two-way product terms.

**Table S6.** Adjusted difference in BASC-2 Composite Scales at ages 2, 3, 4, 5, and 8 years per unit increase in ln-transformed blood lead concentration from sensitivity analyses adjusting for cotinine measures.

| BASC-2 Composite Scale         | Exposure Period (years) | Main Results: Adjusting for Child cotinine |                 | Sensitivity Analysis 1: Adjusting for Maternal Cotinine |                 | Sensitivity Analysis 2: Adjusting for Maternal and Child Cotinine |                 |
|--------------------------------|-------------------------|--------------------------------------------|-----------------|---------------------------------------------------------|-----------------|-------------------------------------------------------------------|-----------------|
|                                |                         | $\beta$ (95% CI)                           | Heterogeneity p | $\beta$ (95% CI)                                        | Heterogeneity p | $\beta$ (95% CI)                                                  | Heterogeneity p |
| Adaptive Skills                |                         |                                            | 0.22            |                                                         | 0.24            |                                                                   | 0.19            |
|                                | 1                       | -0.3 (-1.8, 1.3)                           |                 | -0.7 (-2.3, 0.9)                                        |                 | -0.3 (-1.9, 1.3)                                                  |                 |
|                                | 2                       | 0.8 (-0.8, 2.5)                            |                 | 0.3 (-1.4, 1.9)                                         |                 | 0.7 (-0.9, 2.4)                                                   |                 |
|                                | 3                       | -0.2 (-2.0, 1.5)                           |                 | -1.0 (-2.8, 0.8)                                        |                 | -0.5 (-2.3, 1.2)                                                  |                 |
|                                | 4                       | 0.1 (-2.3, 2.5)                            |                 | -0.6 (-3.1, 1.8)                                        |                 | -0.1 (-2.5, 2.3)                                                  |                 |
|                                | 5                       | -0.5 (-3.3, 2.3)                           |                 | -1.2 (-4.0, 1.6)                                        |                 | -0.7 (-3.5, 2.0)                                                  |                 |
| Behavioral Symptom Index (BSI) | 8                       | -2.2 (-4.9, 0.5)                           |                 | -3.0 (-5.7, -0.2)                                       |                 | -2.5 (-5.1, 0.2)                                                  |                 |
|                                |                         |                                            | 0.45            |                                                         | 0.32            |                                                                   | 0.32            |
|                                | 1                       | 0.3 (-1.3, 1.9)                            |                 | 0.3 (-1.2, 1.9)                                         |                 | 0.3 (-1.3, 1.9)                                                   |                 |
|                                | 2                       | 0.3 (-1.3, 2.0)                            |                 | 0.5 (-1.2, 2.1)                                         |                 | 0.4 (-1.3, 2.1)                                                   |                 |
|                                | 3                       | 1.1 (-0.6, 2.8)                            |                 | 1.4 (-0.3, 3.0)                                         |                 | 1.3 (-0.4, 3.0)                                                   |                 |
|                                | 4                       | 1.0 (-1.1, 3.1)                            |                 | 1.2 (-0.9, 3.2)                                         |                 | 1.1 (-1.0, 3.2)                                                   |                 |
| Externalizing Problems         | 5                       | 1.4 (-1.3, 4.1)                            |                 | 1.6 (-1.0, 4.2)                                         |                 | 1.6 (-1.1, 4.2)                                                   |                 |
|                                | 8                       | 2.5 (0.1, 4.9)                             |                 | 2.7 (0.4, 5.0)                                          |                 | 2.6 (0.3, 5.0)                                                    |                 |
|                                |                         |                                            | 0.20            |                                                         | 0.17            |                                                                   | 0.17            |
|                                | 1                       | 0.6 (-1.0, 2.1)                            |                 | 0.6 (-1.0, 2.1)                                         |                 | 0.6 (-1.0, 2.2)                                                   |                 |
|                                | 2                       | 0.9 (-0.6, 2.5)                            |                 | 1.0 (-0.6, 2.5)                                         |                 | 0.9 (-0.6, 2.5)                                                   |                 |
|                                | 3                       | 1.8 (0.1, 3.4)                             |                 | 1.9 (0.2, 3.5)                                          |                 | 1.8 (0.2, 3.5)                                                    |                 |
| Internalizing Problems         | 4                       | 0.9 (-1.1, 2.9)                            |                 | 1.0 (-1.0, 2.9)                                         |                 | 0.9 (-1.1, 3.0)                                                   |                 |
|                                | 5                       | 1.6 (-0.8, 4.1)                            |                 | 1.7 (-0.7, 4.1)                                         |                 | 1.7 (-0.8, 4.2)                                                   |                 |
|                                | 8                       | 3.1 (0.7, 5.4)                             |                 | 3.2 (0.9, 5.4)                                          |                 | 3.1 (0.8, 5.4)                                                    |                 |
|                                |                         |                                            | 0.89            |                                                         | 0.91            |                                                                   | 0.91            |
|                                | 1                       | 0.5 (-1.1, 2.1)                            |                 | 0.5 (-1.1, 2.0)                                         |                 | 0.5 (-1.1, 2.1)                                                   |                 |
|                                | 2                       | 0.5 (-1.1, 2.2)                            |                 | 0.5 (-1.1, 2.2)                                         |                 | 0.6 (-1.0, 2.3)                                                   |                 |
|                                | 3                       | 0.1 (-1.7, 1.9)                            |                 | 0.3 (-1.5, 2.0)                                         |                 | 0.3 (-1.5, 2.1)                                                   |                 |
|                                | 4                       | 0.5 (-1.6, 2.5)                            |                 | 0.5 (-1.6, 2.6)                                         |                 | 0.6 (-1.5, 2.6)                                                   |                 |
|                                | 5                       | 0.6 (-1.8, 2.9)                            |                 | 0.7 (-1.7, 3.0)                                         |                 | 0.7 (-1.6, 3.1)                                                   |                 |
|                                | 8                       | 1.3 (-0.6, 3.3)                            |                 | 1.4 (-0.5, 3.4)                                         |                 | 1.5 (-0.4, 3.4)                                                   |                 |

Main adjusted model includes child's age, sex, intervention group, household income, maternal race, maternal depressive symptoms, child's serum cotinine. Sensitivity Analysis 1 includes maternal serum cotinine instead of child's serum cotinine. Sensitivity Analysis 2 adjusts for both maternal and child serum cotinine.

Total participants = 244 (BASC observations: 2Y = 222; 3Y = 210; 4Y = 151; 5Y = 164; 8Y = 171).

Heterogeneity p-values included to indicate difference in associations by exposure timing.



**Table S7.** Adjusted relative risk of BASC-2 scores classified as at-risk or clinically significant at ages 2, 3, 4, 5, and 8 years per unit increase in In-transformed blood lead concentrations from sensitivity analyses adjusting for cotinine measures.

| BASC- 2 Composite Scale<br>or Subscale | Age-adjusted Results | Main Results: Adjusting<br>for Child cotinine | Sensitivity Analysis<br>1: Adjusting for<br>Maternal Cotinine | Sensitivity Analysis 2:<br>Adjusting for Maternal<br>and Child Cotinine |
|----------------------------------------|----------------------|-----------------------------------------------|---------------------------------------------------------------|-------------------------------------------------------------------------|
|                                        | RR (95% CI)          | RR (95% CI)                                   | RR (95% CI)                                                   | RR (95% CI)                                                             |
| Adaptive Skills                        | 1.43 (1.10, 1.87)    | 1.31 (0.98, 1.80)                             | 1.33 (1.00, 1.76)                                             | 1.32 (1.00, 1.77)                                                       |
| Behavioral Symptom Index (BSI)         | 1.70 (1.22, 2.35)    | 1.60 (1.03, 2.48)                             | 1.54 (1.04, 2.28)                                             | 1.60 (1.05, 2.43)                                                       |
| Internalizing                          | 1.10 (0.69, 1.75)    | 0.96 (0.53, 1.72)                             | 1.05 (0.58, 1.90)                                             | 0.97 (0.56, 1.70)                                                       |
| Externalizing                          | 1.73 (1.19, 2.51)    | 1.56 (0.95, 2.56)                             | 1.44 (0.83, 2.52)                                             | 1.49 (0.82, 2.71)                                                       |
| <i>Hyperactivity</i>                   | 1.47 (1.14, 1.88)    | 1.48 (1.08, 2.02)                             | 1.47 (1.09, 1.99)                                             | 1.51 (1.11, 2.04)                                                       |
| <i>Aggression</i>                      | 1.60 (1.16, 2.20)    | 1.72 (1.19, 2.51)                             | 1.69 (1.17, 2.46)                                             | 1.74 (1.19, 2.53)                                                       |
| <i>Conduct</i>                         | 1.94 (1.04, 3.62)    | 1.73 (0.97, 3.07)                             | 1.77 (1.07, 2.93)                                             | 1.79 (1.03, 3.12)                                                       |

Age-adjusted models include child's age.

Main adjusted and sensitivity models also include child's age, sex, intervention group, household income, maternal race, maternal depressive symptoms.

Adaptive Skills, BSI, Internalizing, and Externalizing Composite, as well as Hyperactivity and Aggression Subscale models include repeated blood lead concentrations (ages 2-8 years) and repeated BASC-2 score category (participants n=232).

Conduct models include blood lead concentrations at age 8 years and BASC-2 scores at age 8 years only (participants n=147).

At-risk for clinically significant problematic behaviors indicated by Adaptive Skills scores  $\leq 40$ , or BSI, Internalizing, as well as Externalizing composite and subscale scores  $\geq 60$

**Table S8.** Adjusted difference in BASC-2 Composite Scales at ages 2, 3, 4, 5, and 8 years per unit increase in ln-transformed blood lead concentration from sensitivity analyses adjusting for other covariates.

| BASC-2 Composite Scale         | Exposure Period (years) | Main Results     |         | Sensitivity Analysis 1: Adjusting for Home Inventory Score |         | Sensitivity Analysis 2: Adjusting for HOME Inventory Score and Maternal IQ |         | Sensitivity Analysis 3: Adjusting for Maternal Education Instead of Household Income |         |
|--------------------------------|-------------------------|------------------|---------|------------------------------------------------------------|---------|----------------------------------------------------------------------------|---------|--------------------------------------------------------------------------------------|---------|
|                                |                         | $\beta$ (95% CI) | p-value | $\beta$ (95% CI)                                           | p-value | $\beta$ (95% CI)                                                           | p-value | $\beta$ (95% CI)                                                                     | p-value |
| Adaptive Skills                |                         |                  | 0.22    |                                                            | 0.20    |                                                                            | 0.17    |                                                                                      | 0.23    |
|                                | 1                       | -0.3 (-1.8, 1.3) |         | -0.2 (-1.7, 1.4)                                           |         | -0.2 (-1.8, 1.4)                                                           |         | -0.4 (-1.9, 1.1)                                                                     |         |
|                                | 2                       | 0.8 (-0.8, 2.5)  |         | 0.9 (-0.7, 2.6)                                            |         | 1.0 (-0.6, 2.6)                                                            |         | 0.7 (-0.9, 2.2)                                                                      |         |
|                                | 3                       | -0.2 (-2.0, 1.5) |         | -0.1 (-1.9, 1.6)                                           |         | -0.1 (-1.9, 1.6)                                                           |         | -0.4 (-2.1, 1.3)                                                                     |         |
|                                | 4                       | 0.1 (-2.3, 2.5)  |         | 0.3 (-2.0, 2.5)                                            |         | 0.3 (-2.0, 2.5)                                                            |         | -0.1 (-2.4, 2.2)                                                                     |         |
|                                | 5                       | -0.5 (-3.3, 2.3) |         | -0.4 (-3.1, 2.4)                                           |         | -0.4 (-3.1, 2.4)                                                           |         | -0.8 (-3.5, 2.0)                                                                     |         |
|                                | 8                       | -2.2 (-4.9, 0.5) |         | -2.1 (-4.8, 0.5)                                           |         | -2.1 (-4.8, 0.5)                                                           |         | -2.4 (-5.0, 0.2)                                                                     |         |
| Behavioral Symptom Index (BSI) |                         |                  | 0.45    |                                                            | 0.45    |                                                                            | 0.44    |                                                                                      | 0.36    |
|                                | 1                       | 0.3 (-1.3, 1.9)  |         | 0.3 (-1.3, 1.9)                                            |         | 0.3 (-1.3, 1.9)                                                            |         | 0.6 (-0.9, 2.1)                                                                      |         |
|                                | 2                       | 0.3 (-1.3, 2.0)  |         | 0.4 (-1.3, 2.1)                                            |         | 0.4 (-1.3, 2.2)                                                            |         | 0.7 (-0.9, 2.3)                                                                      |         |
|                                | 3                       | 1.1 (-0.6, 2.8)  |         | 1.2 (-0.5, 2.9)                                            |         | 1.2 (-0.5, 2.9)                                                            |         | 1.6 (0.0, 3.1)                                                                       |         |
|                                | 4                       | 1.0 (-1.1, 3.1)  |         | 1.1 (-1.0, 3.1)                                            |         | 1.1 (-1.0, 3.2)                                                            |         | 1.4 (-0.6, 3.5)                                                                      |         |
|                                | 5                       | 1.4 (-1.3, 4.1)  |         | 1.5 (-1.2, 4.2)                                            |         | 1.5 (-1.3, 4.3)                                                            |         | 1.9 (-0.7, 4.6)                                                                      |         |
|                                | 8                       | 2.5 (0.1, 4.9)   |         | 2.5 (0.2, 4.9)                                             |         | 2.6 (0.2, 5.0)                                                             |         | 2.9 (0.6, 5.2)                                                                       |         |
| Externalizing Problems         |                         |                  | 0.20    |                                                            | 0.21    |                                                                            | 0.19    |                                                                                      | 0.10    |
|                                | 1                       | 0.6 (-1.0, 2.1)  |         | 0.6 (-1.0, 2.2)                                            |         | 0.6 (-1.0, 2.2)                                                            |         | 0.9 (-0.6, 2.4)                                                                      |         |
|                                | 2                       | 0.9 (-0.6, 2.5)  |         | 1.0 (-0.6, 2.5)                                            |         | 1.0 (-0.6, 2.7)                                                            |         | 1.3 (-0.2, 2.8)                                                                      |         |
|                                | 3                       | 1.8 (0.1, 3.4)   |         | 1.8 (0.2, 3.4)                                             |         | 1.8 (0.2, 3.5)                                                             |         | 2.2 (0.7, 3.8)                                                                       |         |
|                                | 4                       | 0.9 (-1.1, 2.9)  |         | 1.0 (-1.0, 3.0)                                            |         | 1.0 (-1.0, 3.0)                                                            |         | 1.3 (-0.7, 3.3)                                                                      |         |
|                                | 5                       | 1.6 (-0.8, 4.1)  |         | 1.7 (-0.8, 4.2)                                            |         | 1.7 (-0.8, 4.3)                                                            |         | 2.1 (-0.3, 4.5)                                                                      |         |
|                                | 8                       | 3.1 (0.7, 5.4)   |         | 3.1 (0.8, 5.4)                                             |         | 3.1 (0.8, 5.5)                                                             |         | 3.6 (1.4, 5.9)                                                                       |         |
| Internalizing Problems         |                         |                  | 0.89    |                                                            | 0.90    |                                                                            | 0.89    |                                                                                      | 0.87    |
|                                | 1                       | 0.5 (-1.1, 2.1)  |         | 0.6 (-0.9, 2.2)                                            |         | 0.6 (-0.9, 2.1)                                                            |         | 0.6 (-0.9, 2.1)                                                                      |         |
|                                | 2                       | 0.5 (-1.1, 2.2)  |         | 0.7 (-0.9, 2.3)                                            |         | 0.7 (-0.9, 2.4)                                                            |         | 0.7 (-0.9, 2.3)                                                                      |         |
|                                | 3                       | 0.1 (-1.7, 1.9)  |         | 0.3 (-1.5, 2.0)                                            |         | 0.3 (-1.5, 2.0)                                                            |         | 0.2 (-1.3, 1.8)                                                                      |         |
|                                | 4                       | 0.5 (-1.6, 2.5)  |         | 0.7 (-1.3, 2.8)                                            |         | 0.7 (-1.3, 2.8)                                                            |         | 0.6 (-1.4, 2.6)                                                                      |         |
|                                | 5                       | 0.6 (-1.8, 2.9)  |         | 0.8 (-1.6, 3.1)                                            |         | 0.8 (-1.6, 3.2)                                                            |         | 0.6 (-1.6, 2.9)                                                                      |         |
|                                | 8                       | 1.3 (-0.6, 3.3)  |         | 1.5 (-0.4, 3.4)                                            |         | 1.5 (-0.5, 3.4)                                                            |         | 1.5 (-0.4, 3.4)                                                                      |         |

Main adjusted model includes child's age, sex, intervention group, household income, maternal race, maternal depressive symptoms, child's serum cotinine. Sensitivity Analysis 1 model also includes the HOME Inventory Score assessed at age 1 year. Sensitivity Analysis 2 model includes HOME Inventory Score and maternal IQ. Total participants = 244 (BASC observations: 2Y = 222; 3Y = 210; 4Y = 151; 5Y = 164; 8Y = 171). Heterogeneity p-values included to indicate difference in associations by exposure timing.

**Table S9.** Adjusted relative risk of BASC-2 scores classified as at-risk or clinically significant at ages 2, 3, 4, 5, and 8 years per unit increase in ln-transformed blood lead concentrations from sensitivity analyses adjusting for other covariates.

| BASC- 2 Composite Scale<br>or Subscale | Age-adjusted<br>Results | Main Results      | Sensitivity<br>Analysis 1:<br>Adjusting for<br>HOME<br>Inventory Score | Sensitivity<br>Analysis 2:<br>Adjusting for<br>HOME Inventory<br>Score and<br>Maternal IQ | Sensitivity Analysis 3:<br>Adjusting for Maternal<br>Education Instead of Household<br>Income |
|----------------------------------------|-------------------------|-------------------|------------------------------------------------------------------------|-------------------------------------------------------------------------------------------|-----------------------------------------------------------------------------------------------|
|                                        |                         |                   |                                                                        |                                                                                           |                                                                                               |
| Adaptive Skills                        | 1.43 (1.10, 1.87)       | 1.31 (0.98, 1.80) | 1.33 (1.00, 1.80)                                                      | 1.32 (0.98, 1.77)                                                                         | 1.37 (1.02, 1.84)                                                                             |
| Behavioral Symptom Index<br>(BSI)      | 1.70 (1.22, 2.35)       | 1.60 (1.03, 2.48) | 1.64 (1.09, 2.46)                                                      | 1.65 (1.10, 2.50)                                                                         | 1.69 (1.12, 2.56)                                                                             |
| Internalizing                          | 1.10 (0.69, 1.75)       | 0.96 (0.53, 1.72) | 0.99 (0.56, 1.76)                                                      | 1.02 (0.57, 1.83) <sup>a</sup>                                                            | 0.89 (0.51, 1.56)                                                                             |
| Externalizing                          | 1.73 (1.19, 2.51)       | 1.56 (0.95, 2.56) | 1.55 (0.94, 2.56)                                                      | 1.52 (0.89, 2.61)                                                                         | 1.56 (0.98, 2.48)                                                                             |
| <i>Hyperactivity</i>                   | 1.47 (1.14, 1.88)       | 1.48 (1.08, 2.02) | 1.48 (1.09, 2.01)                                                      | 1.48 (1.09, 2.01)                                                                         | 1.42 (1.05, 1.93)                                                                             |
| <i>Aggression</i>                      | 1.60 (1.16, 2.20)       | 1.72 (1.19, 2.51) | 1.71 (1.18, 2.49)                                                      | 1.76 (1.20, 2.59)                                                                         | 1.73 (1.19, 2.51)                                                                             |
| <i>Conduct</i>                         | 1.94 (1.04, 3.62)       | 1.73 (0.97, 3.07) | 1.74 (0.97, 3.10)                                                      | 1.63 (0.91, 2.92)                                                                         | 2.15 (1.04, 4.45)                                                                             |

Main adjusted model includes child's age, sex, intervention group, household income, maternal race, maternal depressive symptoms, child's serum cotinine.

Adaptive Skills, BSI, Internalizing, and Externalizing Composite, as well as Hyperactivity and Aggression Subscale models include repeated blood lead concentrations (ages 2-8 years) and repeated BASC-2 score category (participants n=232).

Conduct models include blood lead concentrations at age 8 years and BASC-2 scores at age 8 years only (participants n=147).

At-risk for clinically significant problematic behaviors indicated by Adaptive Skills scores  $\leq 40$ , or BSI, Internalizing, as well as Externalizing composite and subscale scores  $\geq 60$

<sup>a</sup> Model did not converge with both HOME Inventory score and maternal IQ added to fully-adjusted models, so only maternal IQ was added to the model.

**Table S10.** Adjusted difference in BASC-2 Composite Scales per unit increase in ln-transformed blood lead concentration from sensitivity analyses.

| BASC-2 Composite Scale         | Exposure Period (years) | Fully-adjusted   |                 | 8-year BASC Only |                 | Removing Intervention |                 |
|--------------------------------|-------------------------|------------------|-----------------|------------------|-----------------|-----------------------|-----------------|
|                                |                         | $\beta$ (95% CI) | Heterogeneity p | $\beta$ (95% CI) | Heterogeneity p | $\beta$ (95% CI)      | Heterogeneity p |
| Adaptive Skills                |                         |                  | 0.22            |                  | 0.05            |                       | 0.23            |
|                                | 1                       | -0.3 (-1.8, 1.3) |                 | -1.8 (-4.0, 0.3) |                 | -0.2 (-1.8, 1.4)      |                 |
|                                | 2                       | 0.8 (-0.8, 2.5)  |                 | 0.5 (-1.9, 2.9)  |                 | 0.9 (-0.8, 2.6)       |                 |
|                                | 3                       | -0.2 (-2.0, 1.5) |                 | -1.0 (-3.3, 1.4) |                 | -0.2 (-2.0, 1.6)      |                 |
|                                | 4                       | 0.1 (-2.3, 2.5)  |                 | -0.6 (-4.0, 2.8) |                 | 0.1 (-2.2, 2.5)       |                 |
|                                | 5                       | -0.5 (-3.3, 2.3) |                 | 0.2 (-3.0, 3.4)  |                 | -0.5 (-3.3, 2.3)      |                 |
|                                | 8                       | -2.2 (-4.9, 0.5) |                 | -2.2 (-4.8, 0.5) |                 | -2.2 (-4.9, 0.5)      |                 |
| Behavioral Symptom Index (BSI) |                         |                  | 0.44            |                  | 0.47            |                       | 0.44            |
|                                | 1                       | 0.3 (-1.3, 1.9)  |                 | 2.0 (-0.2, 4.2)  |                 | 0.3 (-1.3, 1.9)       |                 |
|                                | 2                       | 0.3 (-1.3, 2.0)  |                 | 0.7 (-1.7, 3.1)  |                 | 0.4 (-1.3, 2.1)       |                 |
|                                | 3                       | 1.1 (-0.6, 2.8)  |                 | 1.3 (-0.8, 3.3)  |                 | 1.2 (-0.5, 2.9)       |                 |
|                                | 4                       | 1.0 (-1.1, 3.1)  |                 | 1.6 (-1.2, 4.5)  |                 | 1.1 (-1.0, 3.2)       |                 |
|                                | 5                       | 1.4 (-1.3, 4.1)  |                 | 1.7 (-1.4, 4.8)  |                 | 1.5 (-1.3, 4.2)       |                 |
|                                | 8                       | 2.5 (0.1, 4.9)   |                 | 2.3 (0.0, 4.6)   |                 | 2.6 (0.2, 5.0)        |                 |
| Externalizing Problems         |                         |                  | 0.20            |                  | 0.69            |                       | 0.20            |
|                                | 1                       | 0.6 (-1.0, 2.1)  |                 | 1.8 (-0.5, 4.1)  |                 | 0.6 (-0.9, 2.2)       |                 |
|                                | 2                       | 0.9 (-0.6, 2.5)  |                 | 1.3 (-1.0, 3.6)  |                 | 1.0 (-0.6, 2.6)       |                 |
|                                | 3                       | 1.8 (0.1, 3.4)   |                 | 1.9 (-0.1, 3.9)  |                 | 1.8 (0.1, 3.5)        |                 |
|                                | 4                       | 0.9 (-1.1, 2.9)  |                 | 1.5 (-1.3, 4.3)  |                 | 1.0 (-1.1, 3.0)       |                 |
|                                | 5                       | 1.6 (-0.8, 4.1)  |                 | 1.9 (-1.0, 4.9)  |                 | 1.7 (-0.8, 4.2)       |                 |
|                                | 8                       | 3.1 (0.7, 5.4)   |                 | 2.9 (0.7, 5.1)   |                 | 3.1 (0.8, 5.5)        |                 |
| Internalizing Problems         |                         |                  | 0.89            |                  | 0.57            |                       | 0.88            |
|                                | 1                       | 0.5 (-1.1, 2.1)  |                 | 1.6 (-0.5, 3.6)  |                 | 0.6 (-1.0, 2.2)       |                 |
|                                | 2                       | 0.5 (-1.1, 2.2)  |                 | 0.5 (-1.6, 2.6)  |                 | 0.6 (-1.1, 2.4)       |                 |
|                                | 3                       | 0.1 (-1.7, 1.9)  |                 | 0.6 (-1.3, 2.6)  |                 | 0.2 (-1.6, 2.0)       |                 |
|                                | 4                       | 0.5 (-1.6, 2.5)  |                 | 1.1 (-1.2, 3.4)  |                 | 0.6 (-1.5, 2.7)       |                 |
|                                | 5                       | 0.6 (-1.8, 2.9)  |                 | 1.1 (-1.4, 3.7)  |                 | 0.6 (-1.8, 3.1)       |                 |
|                                | 8                       | 1.3 (-0.6, 3.3)  |                 | 1.6 (-0.4, 3.5)  |                 | 1.5 (-0.5, 3.5)       |                 |

Main fully-adjusted include child's age, sex, intervention group, household income, maternal race, maternal depressive symptoms.

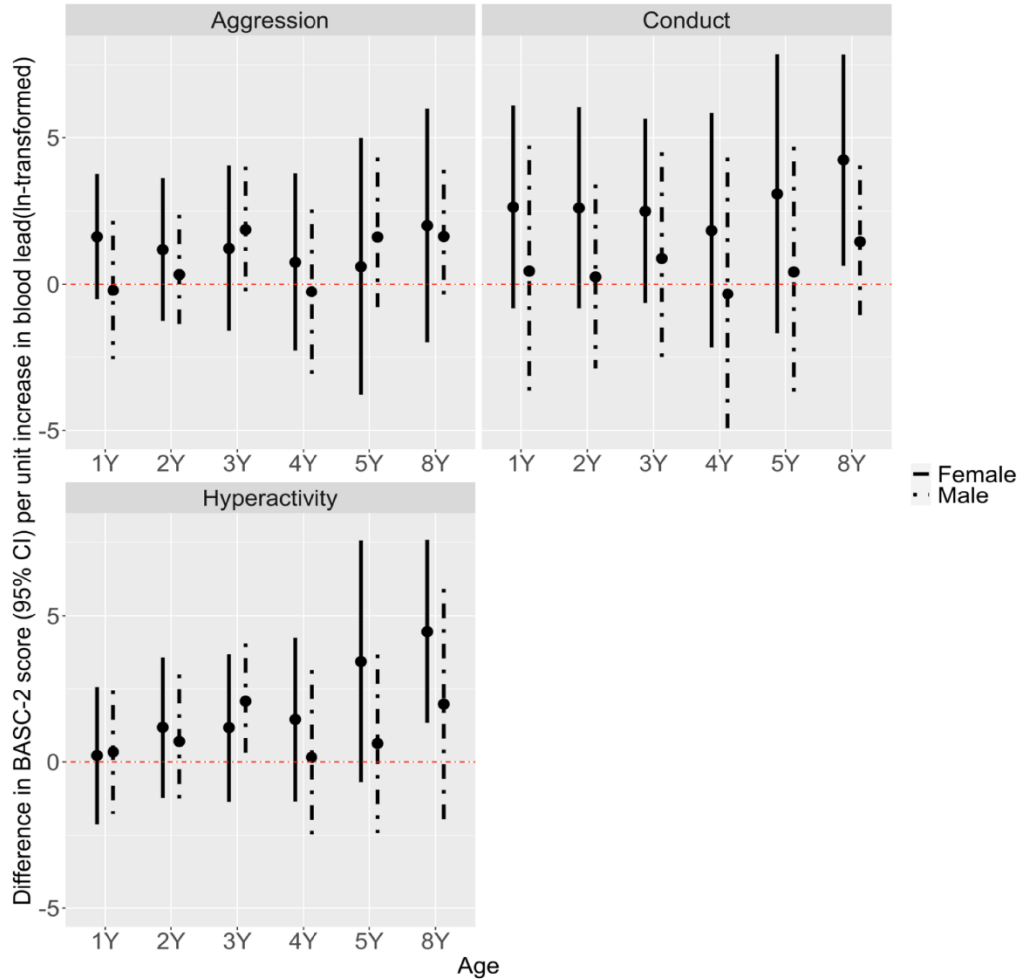

**Figure S1. Adjusted difference in repeated BASC-2 composite scores at ages 2-8 years per unit increase in ln-transformed blood lead concentration at ages 1, 2, 3, 4, 5, and 8 years by sex.**

Model adjusted for child's age, household income, maternal race, maternal depressive symptoms, child's serum cotinine, intervention group.

Total participants = 244 (BASC observations: 2Y = 222; 3Y = 210; 4Y = 151; 5Y = 164; 8Y = 171). Conduct models include blood lead concentrations at age 1, 2, 3, 4, 5 and 8 years and BASC-2 scores at age 8 years only (participants n=147). Female (n=132) Heterogeneity p-value: Aggression = 0.88, Conduct = 0.57, Hyperactivity = 0.10; Male (n=112) Heterogeneity p-value: Aggression = 0.18, Conduct = 0.95, Hyperactivity = 0.33.

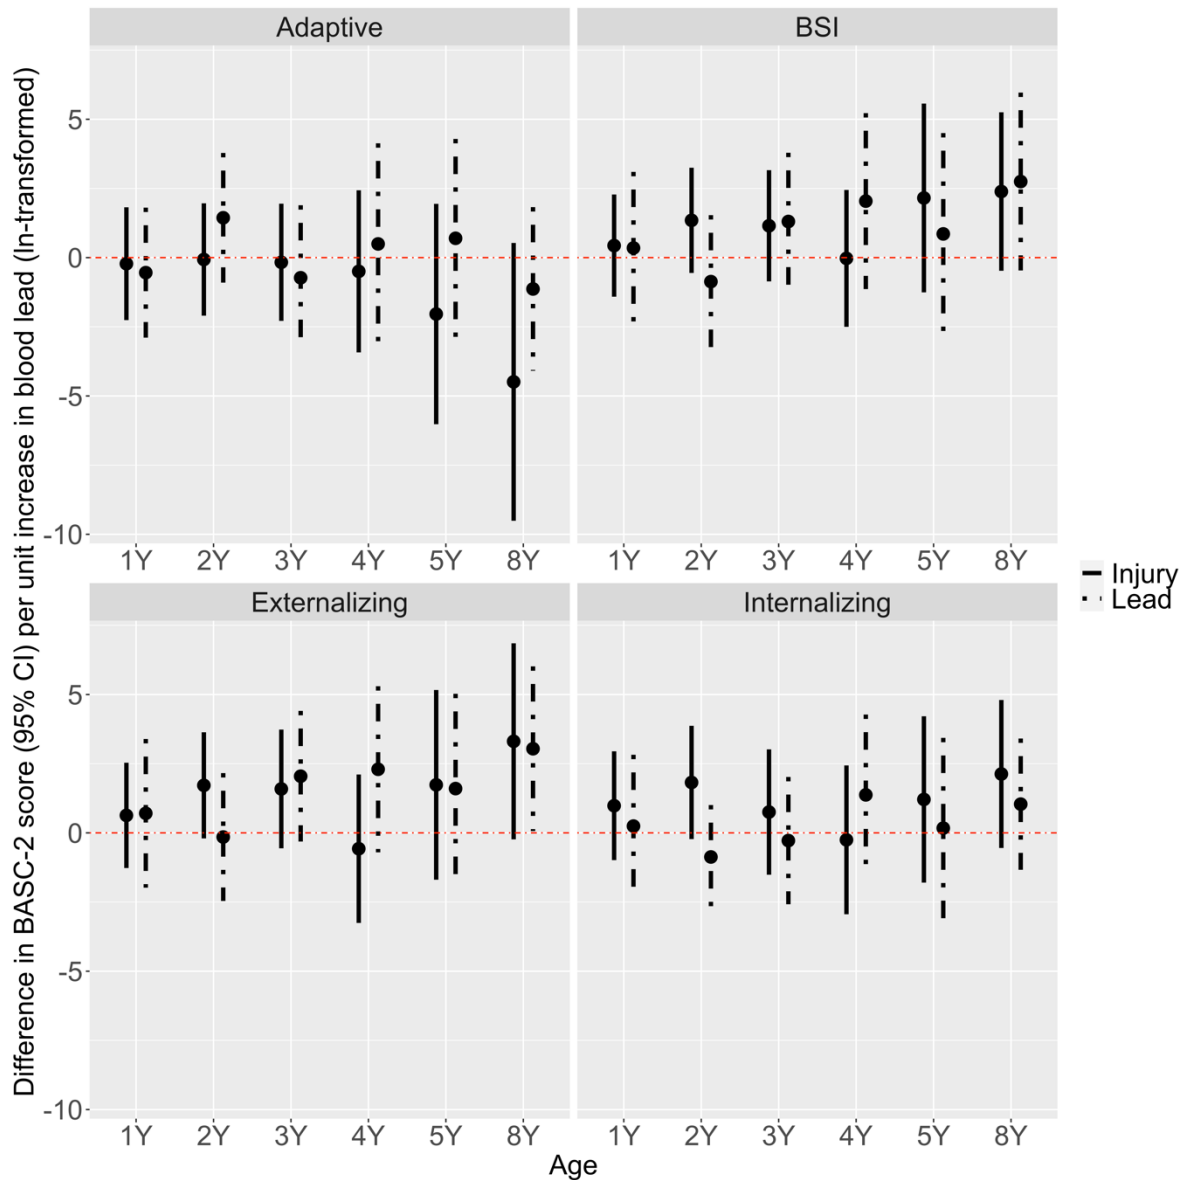

**Figure S2.** Adjusted difference in repeated BASC-2 composite scores at ages 2, 3, 4, 5, and 8 years per unit increase in ln-transformed blood lead concentration at ages 1, 2, 3, 4, 5, and 8 years in the injury prevention (n=125) and lead hazard (n=119) intervention groups. Model adjusted for child's age, sex, household income, maternal race, maternal depressive symptoms, child's serum cotinine. Total participants = 244 (BASC observations: 2Y = 222; 3Y = 210; 4Y = 151; 5Y = 164; 8Y = 171).
